# Supplementary material for: Temperature Dependence of Water Contact Angle on Teflon AF1600
Source: Langmuir. 2022 Jan 20;38(4):1631–7. doi: 10.1021/acs.langmuir.1c03202 (PMC8812120; doi:10.1021/acs.langmuir.1c03202)
Supplement: Supplementary file 1 — la1c03202_si_001.pdf [file la1c03202_si_001.pdf]

# SUPPORTING INFORMATION

## Temperature dependence of water contact angle on Teflon AF1600

Yijie Xiang,\* Paul Fulmek, Daniel Platz, and Ulrich Schmid\*

*Institute of Sensor and Actuator Systems, Vienna University of Technology, Vienna, 1040,  
Austria*

E-mail: yijie.xiang@tuwien.ac.at; ulrich.e366.schmid@tuwien.ac.at

## Contents

|                                                        |   |
|--------------------------------------------------------|---|
| Comparison of FTIR results                             | 2 |
| Derivation of the Eq. (3) and the calculation of $A_m$ | 3 |

## Comparison of FTIR results

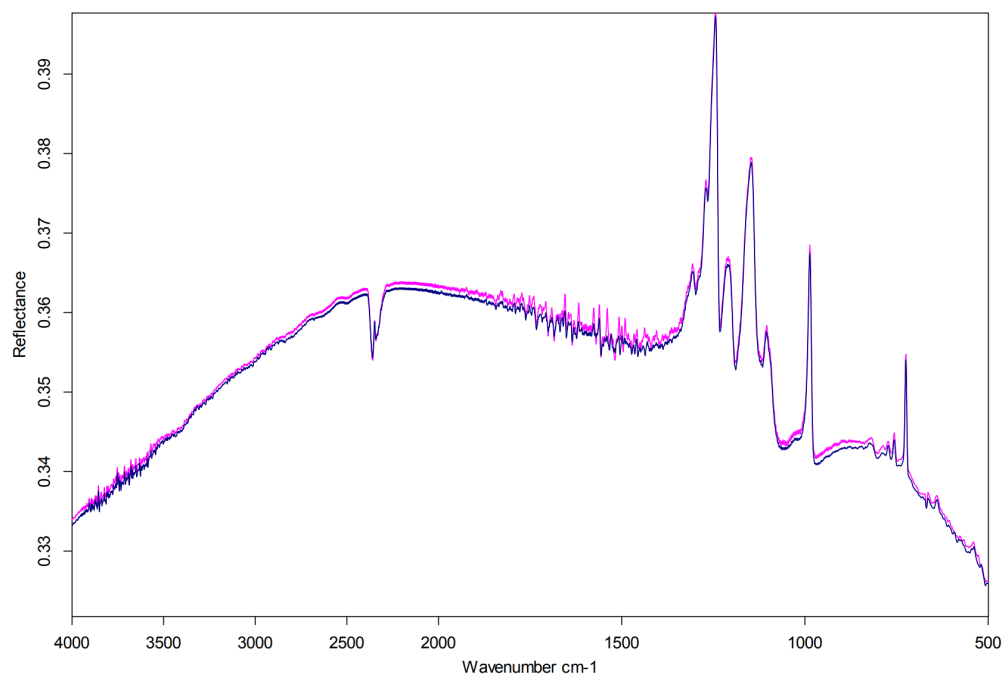

Figure S1: The FTIR spectra of Teflon AF1600 with two baking steps (in violet) and with three baking steps (in blue). The peaks at  $2000 \sim 1500\text{cm}^{-1}$  and  $\sim 2300\text{cm}^{-1}$  indicate water and carbon dioxide inside the measurement chamber, respectively. In the interesting wavenumber range between  $1500$  to  $500\text{ cm}^{-1}$  for Teflon AF1600, no differences have been found between both spectra within the measurement accuracy.

## Derivation of the Eq. (3) and the calculation of $A_m$

An expression based on the Gibbs adsorption equation has been presented by *Extrand*<sup>1</sup> to characterize the energy change of the solid-liquid interface between advancing and receding WCA. We use the same expression to describe the energy change during the evaporation process, from the initial WCA to the stabilized WCA:  $\Delta g = -(\frac{RT}{A_m}) \ln \frac{\sin \theta_{\text{sta}}}{\sin \theta_{\text{init}}}$ . The  $A_m$  is the molar surface area of solid surface and calculated by:

$$A_m = (\frac{M_0}{\rho})^{2/3} N^{1/3}. \quad (1)$$

In our case, the solid material is Teflon AF1600. The  $A_m$  of Teflon AF1600 is 192 436.08 m<sup>2</sup>/mol, calculated with the Avogadro constant  $N = 6.022 \cdot 10^{23} \text{ mol}^{-1}$ , the density  $\rho = 1.78 \text{ g/mL}$ , and the monomer weight  $M_0$ , given by the components 4,5-difluor-2,2-bis-47(trifluormethyl)-1,3-dioxol (PDD, 244.04 g/mol, 65 mol %) and tetrafluorethylen (TFE, 100.02 g/mol, 35 mol %),  $M_0 = 193.63 \text{ g/mol}$ .

A short derivation of the expression  $\Delta g$  achieved by *Extrand* is introduced in the following, and more details can be found in the original paper. The Gibbs adsorption equation relates the surface free energy  $g$  of the solid to its chemical potential  $\mu_s$ :

$$-dg = \frac{1}{A_m} d\mu_s. \quad (2)$$

At the solid-liquid interface, the chemical potential change of the liquid-molecules adsorbed onto the solid  $\mu_s$  is equal to that of the liquid droplet  $\mu_l$ :

$$d\mu_s = d\mu_l = RT d(\ln p_l) \quad (3)$$

where  $R$  is the ideal gas constant,  $T$  is the absolute temperature and  $p_l$  is the pressure across the liquid interface. The  $\Delta g$  between the solid states with initial WCA and the stabilized

WCA can be therefore written by combining Eq. 2 and Eq. 3 as:

$$\Delta g = g^{sta} - g^{init} = -\frac{RT}{A_m} \ln \frac{p_l^{sta}}{p_l^{init}}. \quad (4)$$

$p_l^{sta}$  and  $p_l^{init}$  can be calculated by Young-Laplace pressure,<sup>2</sup>

$$p_l = \gamma_{la} \cdot \frac{2}{r}, \quad (5)$$

with the radius  $r$  of the liquid droplet. Assuming a spherical cap shape of the small droplet in our case ( $r = 1 \text{ mm}$ ),  $r$  can be written as

$$r = \frac{x}{\sin \theta}, \quad (6)$$

where  $x$  is the contact area radius. In the CCR regime, the triple-line is pinned, so that the contact area radius  $x$  is constant, while the WCA decreases from the initial WCA to the stabilized WCA. Plugging Eq. 5 and Eq. 6 into Eq. 4 gives the final equation.

$$\Delta g = -\left(\frac{RT}{A_m}\right) \ln \frac{\sin \theta_{sta}}{\sin \theta_{init}} \quad (7)$$

## References

- (1) Extrand, C. A thermodynamic model for contact angle hysteresis. *Journal of Colloid and interface Science* **1998**, *207*, 11–19.
- (2) Brochard-Wyart, F.; Quéré, D. *Capillarity and wetting phenomena: drops, bubbles, pearls, waves*; Springer, 2004.
